# Supplementary material
Source: Research Square preprint supplement (doi:10.21203/rs.3.rs-8975314/v1)
Supplement: Supplementary file 1 [file 674e8b3a7120f0750d8ee96f.docx]

**Supplemental File 3: Result of Receiver Operating Characteristics analysis for inflammatory biomarkers to distinguish sepsis from PGE1 induced systemic inflammation (Primary and Sensitivity Analyses)**

|  |  | **Cut-off Value** | **AUC**  **(95% CI)** | **Sensitivity** | **Specificity** | **PPV** | **NPV** | **LR+** | **LR-** |
| --- | --- | --- | --- | --- | --- | --- | --- | --- | --- |
| **C-Reactive Protein** | Primary Analysis | 19.60 mg/L | 0.97  (0.92, 1.00) | 100% | 88% | 71% | 100% | 8.77 | 0.00 |
| Sensitivity Analysis | 19.60 mg/L | 0.97  (0.94-0.99) | 100% | 90% | 57.9% | 100% | 9.75 | 0.00 |
| **Procalcitonin** | Primary Analysis | 0.55 ng/mL | 0.91  (0.80, 0.99) | 90% | 82% | 60% | 97% | 5.26 | 0.12 |
| Sensitivity Analysis | 1.35 ng/mL | 0.91  (0.83-0.98) | 82% | 90% | 52.9% | 97.2% | 7.98 | 0.20 |
| **C-Reactive Protein + Procalcitonin** | Primary Analysis | ---- | 0.98  (0.95, 1.00) | 100% | 88% | 71% | 100% | 17.54 | 0.00 |
| Sensitivity Analysis | ---- | 0.98  (0.95-1.00) | 100% | 89% | 55% | 100% | 8.67 | 0.00 |
| **Presepsin** | Primary Analysis | 2.23ng/mL | 0.98  (0.94, 1.00) | 100% | 94% | 83% | 100% | 17.54 | 0.00 |
| Sensitivity Analysis | 2.23 ng/mL | 0.99  (0.97-1.00) | 100% | 97% | 84.6% | 100% | 39.00 | 0.00 |

**Abbreviations:**

AUC: Area Under Curve; 95% CI: 95% Confidence Interval; PPV: Positive Predictive Value; NPV: Negative Predictive Value; LR+: Positive Likelihood Ratio; LR-: Negative Likelihood Ratio.
