# Supplementary material
Source: Research Square preprint supplement (doi:10.21203/rs.3.rs-8975314/v1)
Supplement: Supplementary file 2 [file b193e80b4bf1709723d2545c.docx]

**Supplemental File 4: Comparison of inflammatory biomarkers at ‘Enrolment’ (i.e., at 5th day of PGE1 infusion, n=30) versus ‘All Non-Sepsis Observation Points’ (i.e., including observations at enrolment; n=78) and ‘Post-Enrolment Non-Sepsis Observation Points’ (i.e., after excluding observations at enrolment; n=48).**

| 1. **Comparison of observations at ‘Enrolment’ versus at ‘All Non-Sepsis Observation Points’** | | | |
| --- | --- | --- | --- |
| **Inflammatory Biomarkers** | **Enrolment (n=30)** | **All N-SOPs (n=78)** | **p-value** |
| **Total Leucocyte Count (x109/L)** | 12.56 (9.38, 15.78) | 12.6 (9.30, 15.52) | 0.76 |
| **Absolute Neutrophil Count (x109/L)** | 6.31 (4.63, 10.96) | 5.57 (4.13, 8.49) | 0.39 |
| **Platelet Count (x109/L)** | 2.89 (2.34, 3.55) | 370.0 (270.0, 480.0) | 0.01 |
| **C-Reactive Protein (mg/L)*** | 2.5 (1.40, 4.80) (n=27)***** | 3.88 (1.75, 7.17)  (n=64)***** | 0.13 |
| **Procalcitonin (ng/mL)*** | 0.16 (0.13, 0.76)  (n=17)***** | 0.16 (0.10, 0.45)  (n=53)***** | 0.75 |
| **Presepsin (ng/mL)*** | 1.78 (1.66, 1.92)  (n=20)***** | 1.91 (1.72, 2.0)  (n=57)***** | 0.14 |
| 1. **Comparison of observations at ‘Enrolment’ versus at ‘Post-Enrolment Non-Sepsis Observation Points’** | | | |
| **Inflammatory Biomarkers** | **Enrolment (n=30)** | **Post-Enrolment**  **N-SOPs (n=48)** | **p-value** |
| **Total Leucocyte Count (x109/L)** | 12.56 (9.38, 15.78) | 12.79 (9.44, 15.54) | 0.84 |
| **Absolute Neutrophil Count (x109/L)** | 6.31 (4.63, 10.96) | 5.39 (4.12, 8.21) | 0.31 |
| **Platelet Count (x109/L)** | 2.89 (2.34, 3.55) | 4.17 (3.35, 5.30) | 0.001 |
| **C-Reactive Protein (mg/L)*** | 2.5 (1.40, 4.80) (n=27)***** | 4.3 (2.59, 11.0)  (n=37)***** | 0.05 |
| **Procalcitonin (ng/mL)*** | 0.16 (0.13, 0.76) (n=17)***** | 0.18 (0.10, 0.45)  (n=36)***** | 0.73 |
| **Presepsin (ng/mL)*** | 1.78 (1.66, 1.92) (n=20)***** | 1.95 (1.76, 2.08)  (n=37)***** | 0.04 |

**Abbreviation:** N-SOPs; Non-Sepsis Observation Points

*Values of C-reactive protein, procalcitonin and presepsin are available for the mentioned numbers of observation points.
